# Supplementary material for: A Retrospective 5-Year Single Center Study Highlighting the Risk of Cancer Predisposition in Adolescents and Young Adults
Source: MDPI journal article supplement (doi:10.3390/cancers13123033), 2021-06-17
Supplement: s1 [file s1]

**Table S1:** Abstract of recent data on cancer susceptibility and the proportion of patients with inherited pathogenic germline variants depending on cancer type.

|                                | <i>Tumor entities and associated relevant CPS and CPG</i>                                                                                                                                                                                                                                                                                                                                                                                                                                                                                                                                                                                                                                                                                                                                                                                                                  | <i>Proportion of patients with inherited pathogenic variants</i>                                                                                                                                                                                                                                                                                                                                                                                                                                                                                                                                                                                                                                                                                                                                                                                  |
|--------------------------------|----------------------------------------------------------------------------------------------------------------------------------------------------------------------------------------------------------------------------------------------------------------------------------------------------------------------------------------------------------------------------------------------------------------------------------------------------------------------------------------------------------------------------------------------------------------------------------------------------------------------------------------------------------------------------------------------------------------------------------------------------------------------------------------------------------------------------------------------------------------------------|---------------------------------------------------------------------------------------------------------------------------------------------------------------------------------------------------------------------------------------------------------------------------------------------------------------------------------------------------------------------------------------------------------------------------------------------------------------------------------------------------------------------------------------------------------------------------------------------------------------------------------------------------------------------------------------------------------------------------------------------------------------------------------------------------------------------------------------------------|
| <i>All cases</i>               |                                                                                                                                                                                                                                                                                                                                                                                                                                                                                                                                                                                                                                                                                                                                                                                                                                                                            | <ul style="list-style-type: none"> <li>– 19.7% of 1040 pts<sup>1</sup></li> <li>– 21% of 877 early-onset cancer pts (<i>BRCA1/2, CHEK2, ATM</i>)<sup>2</sup></li> <li>– 13% of 324 young-adult cancer pts (<i>TP53, SDHA</i>)<sup>2</sup></li> </ul>                                                                                                                                                                                                                                                                                                                                                                                                                                                                                                                                                                                              |
| <i>Endocrine system</i>        | <p><b>Medullary thyroid carcinoma</b></p> <ul style="list-style-type: none"> <li>– Multiple Endocrine Neoplasia Type 2 (<i>RET</i>)</li> </ul> <p><b>Papillary thyroid carcinoma</b></p> <ul style="list-style-type: none"> <li>– DICER1 syndrome (<i>DICER1</i>)</li> </ul>                                                                                                                                                                                                                                                                                                                                                                                                                                                                                                                                                                                               | <p><b>Familial non-medullary TC</b></p> <ul style="list-style-type: none"> <li>– 3–9%<sup>3</sup></li> </ul>                                                                                                                                                                                                                                                                                                                                                                                                                                                                                                                                                                                                                                                                                                                                      |
| <i>Skin</i>                    | <p><b>Melanoma</b></p> <ul style="list-style-type: none"> <li>– Familial melanoma (<i>CDKN2A, CDK4, MC1R, BAP1, POT1, TERF2IP, ACD, TERT</i>)</li> </ul>                                                                                                                                                                                                                                                                                                                                                                                                                                                                                                                                                                                                                                                                                                                   | <p><b>Melanoma</b></p> <p>1 of 3 pts<sup>1</sup></p>                                                                                                                                                                                                                                                                                                                                                                                                                                                                                                                                                                                                                                                                                                                                                                                              |
| <i>Male genital system</i>     |                                                                                                                                                                                                                                                                                                                                                                                                                                                                                                                                                                                                                                                                                                                                                                                                                                                                            | <p><b>Prostate cancer</b></p> <ul style="list-style-type: none"> <li>– 19.6% of 362 pts (<i>BRCA1/2, ATM, CHEK2, PMS2, FLCN, PALB2</i>)<sup>1</sup></li> </ul> <p><b>Testicular germ cell tumor</b></p> <ul style="list-style-type: none"> <li>– 22 of 205 pts (DNA repair genes, 1/one-third in <i>CHEK2</i>)<sup>4</sup></li> </ul>                                                                                                                                                                                                                                                                                                                                                                                                                                                                                                             |
| <i>Gastrointestinal system</i> | <p><b>Colorectal cancer</b></p> <ul style="list-style-type: none"> <li>– Hereditary non-polyposis colon cancer (MMR genes)</li> <li>– Cowden’s syndrome/PTEN hamartoma tumor syndrome (<i>PTEN</i>)</li> <li>– Juvenile polyposis syndrome (<i>SMAD4, BMPR1A, ENG</i>)</li> <li>– Peutz–Jeghers syndrome (<i>STK11</i>)</li> <li>– Bannayan–Riley–Ruvalcaba Syndrome (<i>unknown</i>)</li> <li>– (Familial) Adenomatous polyposis syndromes (<i>APC</i>)</li> <li>– Gardner’s syndrome (<i>APC</i>)</li> <li>– Turcot’s syndrome (<i>APC, MLH1, PMS2</i>)</li> <li>– Muir–Torre’s syndrome (<i>MLH1, MSH2</i>)</li> <li>– Oldfield’s syndrome (<i>APC</i>)</li> </ul> <p><b>Hepatocellular carcinoma</b></p> <ul style="list-style-type: none"> <li>– Hereditary tyrosinemia (<i>FAH, TAT, HPD</i>)</li> <li>– Glycogen storage disease (<i>G6PC1, SLC37A4</i>)</li> </ul> | <p><b>Biliary tract cancer</b></p> <ul style="list-style-type: none"> <li>– 16.0% of 131 pts (<i>BRCA1/2, PALB2, BAP1, PMS2, ATM, MITF, NBN</i>)<sup>5</sup></li> <li>– 22.2% of 27 pts (<i>BRCA2</i>)<sup>1</sup></li> </ul> <p><b>Pancreatic cancer</b></p> <ul style="list-style-type: none"> <li>– 16.0% of 131 pts (<i>BRCA1/2, ATM, PALB2, MLH1, MSH2, MSH6, PMS2, CDKN2A, TP53</i>)<sup>6</sup></li> <li>– 25.0% of 176 pts (<i>BRCA1/2, CHEK2, ATM</i>)<sup>1</sup></li> </ul> <p><b>Colon cancer</b></p> <ul style="list-style-type: none"> <li>– 9.2% of 65 pts<sup>1</sup></li> </ul> <p><b>Small-bowel</b></p> <ul style="list-style-type: none"> <li>– 2 of 5 pts<sup>1</sup></li> </ul> <p><b>Esophagogastric carcinoma</b></p> <ul style="list-style-type: none"> <li>– 17.6% of 34 pts (<i>BRCA2, ATM</i>)<sup>1</sup></li> </ul> |

|                              |                                                                                                                                                                                                                                                                                                                                                                                                                                                                                                                                                                                                                                                                                                                                                                                                                                                                                                                                                                                                                                                                                                             |                                                                                                                                                                                                                              |
|------------------------------|-------------------------------------------------------------------------------------------------------------------------------------------------------------------------------------------------------------------------------------------------------------------------------------------------------------------------------------------------------------------------------------------------------------------------------------------------------------------------------------------------------------------------------------------------------------------------------------------------------------------------------------------------------------------------------------------------------------------------------------------------------------------------------------------------------------------------------------------------------------------------------------------------------------------------------------------------------------------------------------------------------------------------------------------------------------------------------------------------------------|------------------------------------------------------------------------------------------------------------------------------------------------------------------------------------------------------------------------------|
|                              | <ul style="list-style-type: none"> <li>– Alpha 1-antitrypsin deficiency (<i>SERPINA1</i>)</li> </ul>                                                                                                                                                                                                                                                                                                                                                                                                                                                                                                                                                                                                                                                                                                                                                                                                                                                                                                                                                                                                        |                                                                                                                                                                                                                              |
| <b>Lymphoma</b>              | <ul style="list-style-type: none"> <li>– Immunodeficiencies</li> <li>– DNA repair defects</li> <li>– Familial lymphoma cases</li> </ul>                                                                                                                                                                                                                                                                                                                                                                                                                                                                                                                                                                                                                                                                                                                                                                                                                                                                                                                                                                     |                                                                                                                                                                                                                              |
| <b>Breast</b>                | <ul style="list-style-type: none"> <li>– Hereditary breast and ovarian cancer (<i>BRCA1</i>, <i>BRCA2</i>)</li> <li>– Li–Fraumeni syndrome (<i>TP53</i>)</li> <li>– Muir–Torre’s syndrome (<i>MLH1</i>, <i>MSH2</i>)</li> <li>– Cowden’s syndrome (<i>PTEN</i>, <i>KLLN</i>, <i>SDHB</i>, <i>SDHC</i>, <i>SDHD</i>, <i>AKT1</i>, <i>PIK3CA</i>)</li> </ul>                                                                                                                                                                                                                                                                                                                                                                                                                                                                                                                                                                                                                                                                                                                                                  | – 16.8% of 101 pts <sup>1</sup>                                                                                                                                                                                              |
| <b>Female genital system</b> | <b>Uterine carcinoma</b> <ul style="list-style-type: none"> <li>– DICER1 syndrome (<i>DICER1</i>)</li> </ul> <b>Ovarian Sertoli–Leydig cell tumor</b> <ul style="list-style-type: none"> <li>– DICER1 syndrome (<i>DICER1</i>)</li> </ul>                                                                                                                                                                                                                                                                                                                                                                                                                                                                                                                                                                                                                                                                                                                                                                                                                                                                   | <b>Ovarian cancer</b> <ul style="list-style-type: none"> <li>– 31.6% of 19 pts (<i>PALB2</i>)<sup>1</sup></li> </ul> <b>Endometrial cancer</b> <ul style="list-style-type: none"> <li>– 16% of 25 pts<sup>1</sup></li> </ul> |
| <b>Leukemia</b>              | <b>Acute lymphoblastic leukemia</b> <ul style="list-style-type: none"> <li>– Trisomy 21 (n.a.)</li> <li>– Neurofibromatosis type 1 (<i>NF1</i>)</li> <li>– Bloom syndrome (<i>BLM</i>)</li> <li>– Shwachman Diamond syndrome (<i>SBDS</i>)</li> <li>– Ataxia telangiectasia (<i>ATM</i>)</li> <li>– PAX5 syndrome (<i>PAX5</i>)</li> <li>– Li-Fraumeni syndrome (<i>TP53</i>)</li> </ul> <b>Acute myeloid leukemia/MDS</b> <ul style="list-style-type: none"> <li>– Trisomy 21 (n.a.)</li> <li>– Fanconi anemia (<i>FANCA</i>, <i>FANCB</i>, <i>FANCC</i>, <i>FANCD1</i>, <i>FANCD2</i>, <i>FANCE</i>, <i>FANCF</i>, <i>FANCG</i>, <i>FANCI</i>, <i>FANJ</i>, <i>FANCL</i>, <i>FANCM</i>, <i>FANCN</i>, <i>FANCO</i>)</li> <li>– Neurofibromatosis type 1 (<i>NF1</i>)</li> <li>– Bloom syndrome (<i>BLM</i>)</li> <li>– Shwachman Diamond syndrome (<i>SBDS</i>)</li> <li>– Familial monosomy 7 (n.a.)</li> <li>– Severe congenital neutropenia (Kostman syndrome) (<i>ELANE</i>, <i>GFI1</i>, <i>HAX1</i>, <i>G6PC3</i>, <i>VPS45</i>, <i>WASP</i>)</li> <li>– Familial MDS/AML (<i>DDX41</i>)</li> </ul> |                                                                                                                                                                                                                              |

|                               |                                                                                                                                                                                                                                                                                                                                                                                                                                                                                                                                                                                                                                                                                                                                                                                                                                                                                                                                                                                                                                                                                                                                                                                                                                                                                                                                                                                                                                                                                                                                                                                                                                                                                                                                                                                                                                                                                                  |                                                                                                                                                                                                       |
|-------------------------------|--------------------------------------------------------------------------------------------------------------------------------------------------------------------------------------------------------------------------------------------------------------------------------------------------------------------------------------------------------------------------------------------------------------------------------------------------------------------------------------------------------------------------------------------------------------------------------------------------------------------------------------------------------------------------------------------------------------------------------------------------------------------------------------------------------------------------------------------------------------------------------------------------------------------------------------------------------------------------------------------------------------------------------------------------------------------------------------------------------------------------------------------------------------------------------------------------------------------------------------------------------------------------------------------------------------------------------------------------------------------------------------------------------------------------------------------------------------------------------------------------------------------------------------------------------------------------------------------------------------------------------------------------------------------------------------------------------------------------------------------------------------------------------------------------------------------------------------------------------------------------------------------------|-------------------------------------------------------------------------------------------------------------------------------------------------------------------------------------------------------|
|                               | <ul style="list-style-type: none"> <li>– Lifelong thrombocytopenia (<i>RUNX1</i>, <i>ANKRD26</i>, <i>ETV6</i>)</li> <li>– MIRAGE syndrome (<i>SAMD9/L</i>)</li> <li>– GATA2 deficiency syndrome (<i>GATA2</i>)</li> <li>– Inherited BMF syndromes (various genes)</li> </ul>                                                                                                                                                                                                                                                                                                                                                                                                                                                                                                                                                                                                                                                                                                                                                                                                                                                                                                                                                                                                                                                                                                                                                                                                                                                                                                                                                                                                                                                                                                                                                                                                                     |                                                                                                                                                                                                       |
| <b>Central nervous system</b> | <p><b><i>Glioma</i></b></p> <ul style="list-style-type: none"> <li>– Neurofibromatosis type 1 and 2 (<i>NF1</i>, <i>NF2</i>)</li> <li>– Tuberous sclerosis type 1 and 2 (<i>TSC1</i>, <i>TSC2</i>)</li> <li>– Von Hippel–Lindau syndrome (<i>VHL</i>)</li> <li>– Li-Fraumeni syndrome (<i>TP53</i>)</li> <li>– Turcot’s syndrome (<i>APC</i>, <i>MLH1</i>, <i>PMS2</i>)</li> </ul> <p><b><i>Medulloblastoma</i></b></p> <ul style="list-style-type: none"> <li>– Li-Fraumeni syndrome (<i>TP53</i>)</li> <li>– Gorlin’s syndrome (<i>PTCH1</i>, <i>SUFU</i>)</li> <li>– Turcot’s syndrome (<i>APC</i>, <i>MLH1</i>, <i>PMS2</i>)</li> </ul> <p><b><i>Meningioma</i></b></p> <ul style="list-style-type: none"> <li>– Neurofibromatosis type 1 and 2 (<i>NF1</i>, <i>NF2</i>)</li> <li>– Gorlin’s syndrome (<i>PTCH1</i>, <i>SUFU</i>)</li> </ul> <p><b><i>Acoustic neuroma</i></b></p> <ul style="list-style-type: none"> <li>– Neurofibromatosis type 2 (<i>NF2</i>)</li> </ul> <p><b><i>Schwannoma</i></b></p> <ul style="list-style-type: none"> <li>– Neurofibromatosis type 2 (<i>NF2</i>)</li> </ul> <p><b><i>Ependymoma</i></b></p> <ul style="list-style-type: none"> <li>– Neurofibromatosis type 2 (<i>NF2</i>)</li> <li>– Tuberous sclerosis type 1 and 2 (<i>TSC1</i>, <i>TSC2</i>)</li> <li>– Multiple endocrine neoplasia type 1 (<i>MEN1</i>)</li> </ul> <p><b><i>Subependymal giant cell astrocytoma</i></b></p> <ul style="list-style-type: none"> <li>– Tuberous sclerosis type 1 and 2 (<i>TSC1</i>, <i>TSC2</i>)</li> </ul> <p><b><i>Hamartoma</i></b></p> <ul style="list-style-type: none"> <li>– Tuberous sclerosis type 1 and 2 (<i>TSC1</i>, <i>TSC2</i>)</li> </ul> <p><b><i>Cerebellar hemangioblastoma</i></b></p> <ul style="list-style-type: none"> <li>– Von Hippel–Lindau syndrome (<i>VHL</i>)</li> </ul> <p><b><i>Atypical teratoid/rhabdoid tumor</i></b></p> | <p><b><i>Medulloblastoma</i></b></p> <ul style="list-style-type: none"> <li>– 6% of 1,022 pts (<i>APC</i>, <i>BRCA2</i>, <i>PALB2</i>, <i>PTCH1</i>, <i>SUFU</i>, <i>TP53</i>)<sup>8</sup></li> </ul> |

|                                                      |                                                                                                                                                                                                                                                                                                                                                                                                                                                                                                                                                                                                                                                                    |                                                                                                                                                                                                                                                                                                                                                                                                                                                                                                                                               |
|------------------------------------------------------|--------------------------------------------------------------------------------------------------------------------------------------------------------------------------------------------------------------------------------------------------------------------------------------------------------------------------------------------------------------------------------------------------------------------------------------------------------------------------------------------------------------------------------------------------------------------------------------------------------------------------------------------------------------------|-----------------------------------------------------------------------------------------------------------------------------------------------------------------------------------------------------------------------------------------------------------------------------------------------------------------------------------------------------------------------------------------------------------------------------------------------------------------------------------------------------------------------------------------------|
|                                                      | <ul style="list-style-type: none"> <li>– Rhabdoid tumor predisposition syndrome type 1 and 2 (<i>SMARCB1</i>, <i>SMARCA4</i>)</li> </ul> <p><b>Pineoblastoma</b></p> <ul style="list-style-type: none"> <li>– Hereditary retinoblastoma (<i>RB1</i>)</li> <li>– DICER1 syndrome (<i>DICER1</i>)</li> </ul> <p><b>Pituitary adenoma</b></p> <ul style="list-style-type: none"> <li>– Multiple endocrine neoplasia type 1 (<i>MEN1</i>)</li> </ul>                                                                                                                                                                                                                   |                                                                                                                                                                                                                                                                                                                                                                                                                                                                                                                                               |
| <b>Respiratory system/<br/>thoracic</b>              |                                                                                                                                                                                                                                                                                                                                                                                                                                                                                                                                                                                                                                                                    | <b>Non-small cell lung cancer</b>                                                                                                                                                                                                                                                                                                                                                                                                                                                                                                             |
|                                                      |                                                                                                                                                                                                                                                                                                                                                                                                                                                                                                                                                                                                                                                                    | – 1 of 2 pts <sup>1</sup>                                                                                                                                                                                                                                                                                                                                                                                                                                                                                                                     |
| <b>Urinary tract</b>                                 |                                                                                                                                                                                                                                                                                                                                                                                                                                                                                                                                                                                                                                                                    | <b>Renal cancer</b>                                                                                                                                                                                                                                                                                                                                                                                                                                                                                                                           |
|                                                      |                                                                                                                                                                                                                                                                                                                                                                                                                                                                                                                                                                                                                                                                    | – 16.4% of 140 pts <sup>1</sup>                                                                                                                                                                                                                                                                                                                                                                                                                                                                                                               |
|                                                      |                                                                                                                                                                                                                                                                                                                                                                                                                                                                                                                                                                                                                                                                    | <b>Bladder cancer (including urothelial carcinoma)</b>                                                                                                                                                                                                                                                                                                                                                                                                                                                                                        |
|                                                      |                                                                                                                                                                                                                                                                                                                                                                                                                                                                                                                                                                                                                                                                    | – 56.3% of 16 pts <sup>1</sup>                                                                                                                                                                                                                                                                                                                                                                                                                                                                                                                |
| <b>Bone/<br/>soft tissue/<br/>mesothelial tissue</b> | <p><b>Osteosarcoma</b></p> <ul style="list-style-type: none"> <li>– Paget disease (<i>SQSTM1</i>)</li> <li>– Hereditary retinoblastoma (<i>RB1</i>)</li> <li>– Rothmund–Thomson syndrome (<i>RECQL4</i>)</li> <li>– Werner syndrome (<i>WRN</i>)</li> <li>– Bloom syndrome (<i>BLM</i>)</li> <li>– Li-Fraumeni syndrome (<i>TP53</i>)</li> </ul> <p><b>Chondrosarcoma</b></p> <ul style="list-style-type: none"> <li>– Marfucci's syndrome (<i>somatic mosaicism in IDH1, IDH2, PTHR1</i>)</li> <li>– Ollier's disease (<i>somatic mosaicism in IDH1, IDH2, PTHR1</i>)</li> <li>– Hereditary multiple osteochondromatosis/exostosis (<i>EXT1, EXT2</i>)</li> </ul> | <p><b>Sarcoma</b></p> <ul style="list-style-type: none"> <li>– 18.1% of 1,201 pts<sup>2</sup></li> <li>– 55% of 1,162 pts (<i>TP53, ATM, BRCA2, ATR</i>)<sup>9</sup></li> </ul> <p><b>Osteosarcoma</b></p> <ul style="list-style-type: none"> <li>– 28.0% of 1004 pts (<i>TP53, CDKN2A, MEN1, VHL, POT1, APC, MSH2, ATRX</i>)<sup>10</sup></li> </ul> <p><b>Sporadic sarcoma</b></p> <ul style="list-style-type: none"> <li>– 13.6% of 66 pts (<i>ATM, BRCA2, ERCC4, FANCC, FANCE, FANCI, MSH6, POLE, SDHA, TP53</i>)<sup>11</sup></li> </ul> |

**Legend:** ACC, adrenocortical carcinoma; CPS, cancer predisposition syndrome; CPG, cancer predisposition gene; GIST, gastrointestinal stromal tumor; PPGL, pheochromocytoma paraganglioma; n.a., not applicable; pts, patients

## References

1. Mandelker D, Zhang L, Kemel Y, et al. Mutation Detection in Patients With Advanced Cancer by Universal Sequencing of Cancer-Related Genes in Tumor and Normal DNA vs Guideline-Based Germline Testing. *JAMA : the journal of the American Medical Association*. 2017;318(9):825-835.

2. Stadler ZK, Maio A, Padunan A, et al. Abstract 1122: Germline mutation prevalence in young adults with cancer. *Cancer research*. 2020;80(16 Supplement):1122-1122.
3. Klubo-Gwiedzinska J, Yang L, Merkel R, et al. Results of Screening in Familial Non-Medullary Thyroid Cancer. *Thyroid*. 2017;27(8):1017-1024.
4. AlDubayan SH, Pyle LC, Gamulin M, et al. Association of Inherited Pathogenic Variants in Checkpoint Kinase 2 (CHEK2) With Susceptibility to Testicular Germ Cell Tumors. *JAMA Oncol*. 2019;5(4):514-522.
5. Maynard H, Stadler ZK, Berger MF, et al. Germline alterations in patients with biliary tract cancers: A spectrum of significant and previously underappreciated findings. *Cancer*. 2020;126(9):1995-2002.
6. Rainone M, Singh I, Salo-Mullen EE, Stadler ZK, O'Reilly EM. An Emerging Paradigm for Germline Testing in Pancreatic Ductal Adenocarcinoma and Immediate Implications for Clinical Practice: A Review. *JAMA Oncol*. 2020;6(5):764-771.
7. Duan L, Grunebaum E. Hematological Malignancies Associated With Primary Immunodeficiency Disorders. *Clinical immunology*. 2018;194:46-59.
8. Waszak SM, Northcott PA, Buchhalter I, et al. Spectrum and prevalence of genetic predisposition in medulloblastoma: a retrospective genetic study and prospective validation in a clinical trial cohort. *The Lancet Oncology*. 2018;19(6):785-798.
9. Ballinger ML, Goode DL, Ray-Coquard I, et al. Monogenic and polygenic determinants of sarcoma risk: an international genetic study. *The Lancet Oncology*. 2016;17(9):1261-1271.
10. Mirabello L, Zhu B, Koster R, et al. Frequency of Pathogenic Germline Variants in Cancer-Susceptibility Genes in Patients With Osteosarcoma. *JAMA Oncol*. 2020.
11. Chan SH, Lim WK, Ishak NDB, et al. Germline Mutations in Cancer Predisposition Genes are Frequent in Sporadic Sarcomas. *Sci Rep*. 2017;7(1):10660.
